# Supplementary material for: Residential exposure to mold, dampness, and indoor air pollution and risk of respiratory tract infections: a study among children ages 11 and 12 in the Danish National Birth Cohort
Source: Springer Nature journal article supplement (doi:10.1007/s10654-024-01101-z), 2024-02-23
Supplement: MOESM1 [file 26770882]

| <b>Common cold</b>    | n      | %    |
|-----------------------|--------|------|
| Never                 | 14 542 | 34.0 |
| 1-2 times             | 22 178 | 51.9 |
| 3-4 times             | 4494   | 10.5 |
| 5-6 times             | 778    | 1.8  |
| >6 times              | 728    | 1.7  |
| <b>Influenza</b>      |        |      |
| Never                 | 32 957 | 77.2 |
| 1-2 times             | 9307   | 21.8 |
| 3-4 times             | 367    | 0.9  |
| 5-6 times             | 55     | 0.1  |
| >6 times              | 34     | 0.1  |
| <b>Tonsillitis</b>    |        |      |
| Never                 | 38 558 | 90.3 |
| 1-2 times             | 3702   | 8.7  |
| 3-4 times             | 351    | 0.8  |
| 5-6 times             | 70     | 0.2  |
| >6 times              | 39     | 0.1  |
| <b>Pneumonia</b>      |        |      |
| Never                 | 41 585 | 97.3 |
| 1-2 times             | 1073   | 2.5  |
| 3 or more times       | 62     | 0.2  |
| <b>Conjunctivitis</b> |        |      |
| Never                 | 41 139 | 96.3 |
| 1-2 times             | 1382   | 3.2  |
| 3-4 times             | 133    | 0.3  |
| 5-6 times             | 31     | 0.1  |
| >6 times              | 35     | 0.1  |

**eTable 1.** Distribution of outcomes in 42 720 adolescents

|                              |          |
|------------------------------|----------|
| <b>Mold/dampness</b>         | <b>%</b> |
| No                           | 80       |
| Yes                          | 20       |
| <b>Gas stove</b>             |          |
| Electric                     | 91       |
| Gas stove                    | 9        |
| <b>Summer candle-burning</b> |          |
| Rarely                       | 51       |
| <1x week                     | 30       |
| 1-2x week                    | 12       |
| 3-4x week                    | 5        |
| 5-6x week                    | 1        |
| Daily                        | 1        |
| <b>Winter candle-burning</b> |          |
| Rarely                       | 6        |
| <1x week                     | 12       |
| 1-2x week                    | 16       |
| 3-4x week                    | 21       |
| 5-6x week                    | 20       |
| Daily                        | 25       |
| <b>Fireplace usage</b>       |          |
| No fireplace                 | 57       |
| Rarely                       | 13       |
| Weekly                       | 14       |
| Daily                        | 17       |
| <b>Cats and dogs indoors</b> |          |
| No                           | 49       |
| Yes                          | 51       |
| <b>Farmhouse</b>             |          |
| No                           | 88       |
| Yes, no livestock            | 5        |
| yes, with<br>livestock       | 7        |

**eTable 2.** Distribution of primary exposures in 42 720 adolescents

|                        | Common cold       |                          | Influenza         |                          | Tonsillitis       |                          | Pneumonia         |                          | Conjunctivitis    |                          |
|------------------------|-------------------|--------------------------|-------------------|--------------------------|-------------------|--------------------------|-------------------|--------------------------|-------------------|--------------------------|
|                        | Crude             | Adjusted                 | Crude             | Adjusted                 | Crude             | Adjusted                 | Crude             | Adjusted                 | Crude             | Adjusted                 |
| Mold/dampness          |                   |                          |                   |                          |                   |                          |                   |                          |                   |                          |
| Yes                    | 1.11 (1.08, 1.13) | <b>1.09 (1.07, 1.12)</b> | 1.12 (1.07, 1.17) | <b>1.10 (1.05, 1.15)</b> | 1.22 (1.13, 1.32) | <b>1.19 (1.10, 1.28)</b> | 1.07 (0.92, 1.23) | <b>1.05 (0.90, 1.21)</b> | 1.22 (1.07, 1.38) | <b>1.16 (1.02, 1.32)</b> |
| Gas stove              |                   |                          |                   |                          |                   |                          |                   |                          |                   |                          |
| Yes                    | 1.00 (0.97, 1.03) | <b>1.00 (0.97, 1.03)</b> | 1.03 (0.97, 1.10) | <b>1.04 (0.98, 1.11)</b> | 1.07 (0.96, 1.19) | <b>1.06 (0.95, 1.18)</b> | 1.14 (0.93, 1.38) | <b>1.14 (0.93, 1.39)</b> | 1.31 (1.11, 1.56) | <b>1.25 (1.05, 1.49)</b> |
| Summer candle-burning  |                   |                          |                   |                          |                   |                          |                   |                          |                   |                          |
| <1x week               | 1.01 (0.99, 1.03) | <b>1.03 (1.01, 1.05)</b> | 1.11 (1.07, 1.16) | <b>1.13 (1.08, 1.18)</b> | 1.04 (0.97, 1.12) | <b>1.06 (0.98, 1.14)</b> | 0.98 (0.85, 1.12) | <b>1.02 (0.89, 1.18)</b> | 1.11 (0.98, 1.26) | <b>1.15 (1.01, 1.31)</b> |
| 1-2x week              | 1.01 (0.98, 1.04) | <b>1.02 (0.99, 1.05)</b> | 1.17 (1.11, 1.24) | <b>1.18 (1.11, 1.26)</b> | 1.18 (1.07, 1.30) | <b>1.16 (1.04, 1.30)</b> | 1.06 (0.88, 1.27) | <b>1.10 (0.90, 1.34)</b> | 1.08 (0.91, 1.28) | <b>1.12 (0.93, 1.35)</b> |
| 3-4x week              | 1.07 (1.02, 1.11) | <b>1.08 (1.03, 1.13)</b> | 1.22 (1.13, 1.33) | <b>1.21 (1.11, 1.32)</b> | 1.28 (1.11, 1.46) | <b>1.23 (1.06, 1.43)</b> | 1.17 (0.89, 1.53) | <b>1.18 (0.88, 1.58)</b> | 1.32 (1.04, 1.67) | <b>1.36 (1.06, 1.76)</b> |
| 5-6x week              | 1.02 (0.94, 1.10) | <b>1.01 (0.94, 1.09)</b> | 1.48 (1.30, 1.68) | <b>1.43 (1.25, 1.63)</b> | 1.40 (1.09, 1.80) | <b>1.29 (1.00, 1.67)</b> | 1.00 (0.62, 1.61) | <b>0.98 (0.60, 1.60)</b> | 1.31 (0.85, 1.99) | <b>1.31 (0.85, 2.02)</b> |
| Daily                  | 0.99 (0.91, 1.07) | <b>1.01 (0.92, 1.09)</b> | 1.19 (1.02, 1.38) | <b>1.16 (0.99, 1.35)</b> | 1.51 (1.21, 1.88) | <b>1.41 (1.12, 1.78)</b> | 1.06 (0.64, 1.75) | <b>1.01 (0.60, 1.70)</b> | 1.08 (0.72, 1.64) | <b>1.11 (0.72, 1.70)</b> |
| Winter candle-burning  |                   |                          |                   |                          |                   |                          |                   |                          |                   |                          |
| <1x week               | 0.97 (0.92, 1.02) | <b>0.98 (0.93, 1.02)</b> | 0.96 (0.87, 1.06) | <b>0.95 (0.86, 1.05)</b> | 0.88 (0.75, 1.03) | <b>0.89 (0.76, 1.05)</b> | 0.78 (0.58, 1.03) | <b>0.81 (0.61, 1.07)</b> | 0.94 (0.72, 1.23) | <b>0.94 (0.72, 1.24)</b> |
| 1-2x week              | 0.96 (0.91, 1.00) | <b>0.96 (0.91, 1.00)</b> | 0.97 (0.88, 1.06) | <b>0.94 (0.85, 1.03)</b> | 0.88 (0.76, 1.02) | <b>0.88 (0.76, 1.03)</b> | 0.73 (0.56, 0.95) | <b>0.76 (0.58, 0.99)</b> | 0.91 (0.70, 1.17) | <b>0.88 (0.68, 1.14)</b> |
| 3-4x week              | 0.95 (0.91, 1.00) | <b>0.95 (0.91, 0.99)</b> | 1.00 (0.91, 1.09) | <b>0.95 (0.87, 1.04)</b> | 0.92 (0.80, 1.07) | <b>0.91 (0.78, 1.05)</b> | 0.82 (0.64, 1.06) | <b>0.84 (0.65, 1.10)</b> | 0.97 (0.75, 1.23) | <b>0.92 (0.71, 1.18)</b> |
| 5-6x week              | 0.97 (0.92, 1.01) | <b>0.96 (0.91, 1.00)</b> | 0.97 (0.89, 1.06) | <b>0.90 (0.82, 0.99)</b> | 0.92 (0.79, 1.06) | <b>0.88 (0.75, 1.02)</b> | 0.71 (0.54, 0.92) | <b>0.71 (0.54, 0.93)</b> | 0.92 (0.72, 1.18) | <b>0.85 (0.66, 1.11)</b> |
| Daily                  | 0.96 (0.92, 1.00) | <b>0.94 (0.90, 0.99)</b> | 1.08 (0.99, 1.18) | <b>0.96 (0.88, 1.06)</b> | 1.05 (0.91, 1.20) | <b>0.95 (0.82, 1.11)</b> | 0.83 (0.65, 1.07) | <b>0.82 (0.63, 1.08)</b> | 0.98 (0.77, 1.24) | <b>0.86 (0.67, 1.12)</b> |
| Fireplace usage        |                   |                          |                   |                          |                   |                          |                   |                          |                   |                          |
| Rarely                 | 0.99 (0.95, 1.02) | <b>1.02 (0.98, 1.05)</b> | 1.03 (0.97, 1.09) | <b>1.06 (0.99, 1.13)</b> | 0.97 (0.86, 1.08) | <b>1.03 (0.92, 1.16)</b> | 0.87 (0.70, 1.07) | <b>0.97 (0.78, 1.21)</b> | 1.06 (0.88, 1.27) | <b>1.13 (0.94, 1.37)</b> |
| <1x week               | 0.95 (0.90, 1.00) | <b>1.00 (0.94, 1.05)</b> | 0.86 (0.77, 0.96) | <b>0.92 (0.82, 1.03)</b> | 0.91 (0.76, 1.09) | <b>1.03 (0.86, 1.23)</b> | 1.04 (0.75, 1.45) | <b>1.23 (0.87, 1.73)</b> | 0.85 (0.61, 1.19) | <b>0.96 (0.69, 1.36)</b> |
| 1-2x week              | 0.95 (0.91, 1.00) | <b>0.99 (0.95, 1.05)</b> | 0.94 (0.84, 1.05) | <b>1.00 (0.89, 1.11)</b> | 0.78 (0.64, 0.94) | <b>0.88 (0.72, 1.06)</b> | 0.80 (0.56, 1.13) | <b>0.94 (0.66, 1.34)</b> | 0.80 (0.58, 1.10) | <b>0.90 (0.65, 1.25)</b> |
| 3-4x week              | 0.94 (0.90, 0.97) | <b>0.98 (0.94, 1.02)</b> | 0.92 (0.84, 1.00) | <b>0.97 (0.89, 1.06)</b> | 0.96 (0.83, 1.10) | <b>1.06 (0.92, 1.22)</b> | 0.77 (0.58, 1.03) | <b>0.91 (0.68, 1.22)</b> | 0.84 (0.65, 1.08) | <b>0.94 (0.73, 1.22)</b> |
| 5-6x week              | 0.95 (0.91, 0.99) | <b>0.99 (0.95, 1.03)</b> | 0.92 (0.84, 1.01) | <b>0.97 (0.88, 1.06)</b> | 0.90 (0.77, 1.06) | <b>0.99 (0.85, 1.16)</b> | 0.80 (0.59, 1.09) | <b>0.94 (0.69, 1.27)</b> | 0.89 (0.68, 1.16) | <b>1.00 (0.76, 1.31)</b> |
| Daily                  | 0.95 (0.92, 0.97) | <b>0.98 (0.95, 1.00)</b> | 0.92 (0.87, 0.97) | <b>0.95 (0.90, 1.00)</b> | 0.98 (0.90, 1.07) | <b>1.05 (0.96, 1.15)</b> | 0.94 (0.80, 1.11) | <b>1.05 (0.88, 1.25)</b> | 0.90 (0.77, 1.05) | <b>0.98 (0.84, 1.15)</b> |
| Cats or dogs           |                   |                          |                   |                          |                   |                          |                   |                          |                   |                          |
| Yes                    | 0.98 (0.96, 1.00) | <b>0.99 (0.97, 1.01)</b> | 1.07 (1.03, 1.11) | <b>1.06 (1.02, 1.10)</b> | 1.05 (0.98, 1.12) | <b>1.06 (0.99, 1.13)</b> | 1.05 (0.93, 1.18) | <b>1.08 (0.95, 1.22)</b> | 0.95 (0.86, 1.06) | <b>0.94 (0.84, 1.05)</b> |
| Farmhouse              |                   |                          |                   |                          |                   |                          |                   |                          |                   |                          |
| Yes, without livestock | 0.96 (0.91, 1.00) | <b>1.00 (0.95, 1.04)</b> | 1.00 (0.92, 1.09) | <b>1.03 (0.95, 1.13)</b> | 0.85 (0.73, 0.99) | <b>0.88 (0.76, 1.03)</b> | 1.11 (0.84, 1.46) | <b>1.17 (0.88, 1.55)</b> | 1.16 (0.92, 1.45) | <b>1.20 (0.96, 1.51)</b> |
| Yes, with livestock    | 0.94 (0.90, 0.97) | <b>0.98 (0.94, 1.01)</b> | 0.97 (0.90, 1.04) | <b>0.99 (0.92, 1.07)</b> | 0.90 (0.78, 1.02) | <b>0.92 (0.80, 1.05)</b> | 0.88 (0.69, 1.13) | <b>0.93 (0.72, 1.20)</b> | 1.02 (0.82, 1.27) | <b>1.05 (0.83, 1.32)</b> |

**Table 3.** Housing and indoor home environment exposures and crude and adjusted IRRs and 95 % CIs of A) common cold, B) influenza, C) tonsillitis, D) pneumonia and E) conjunctivitis in 42 720 adolescents

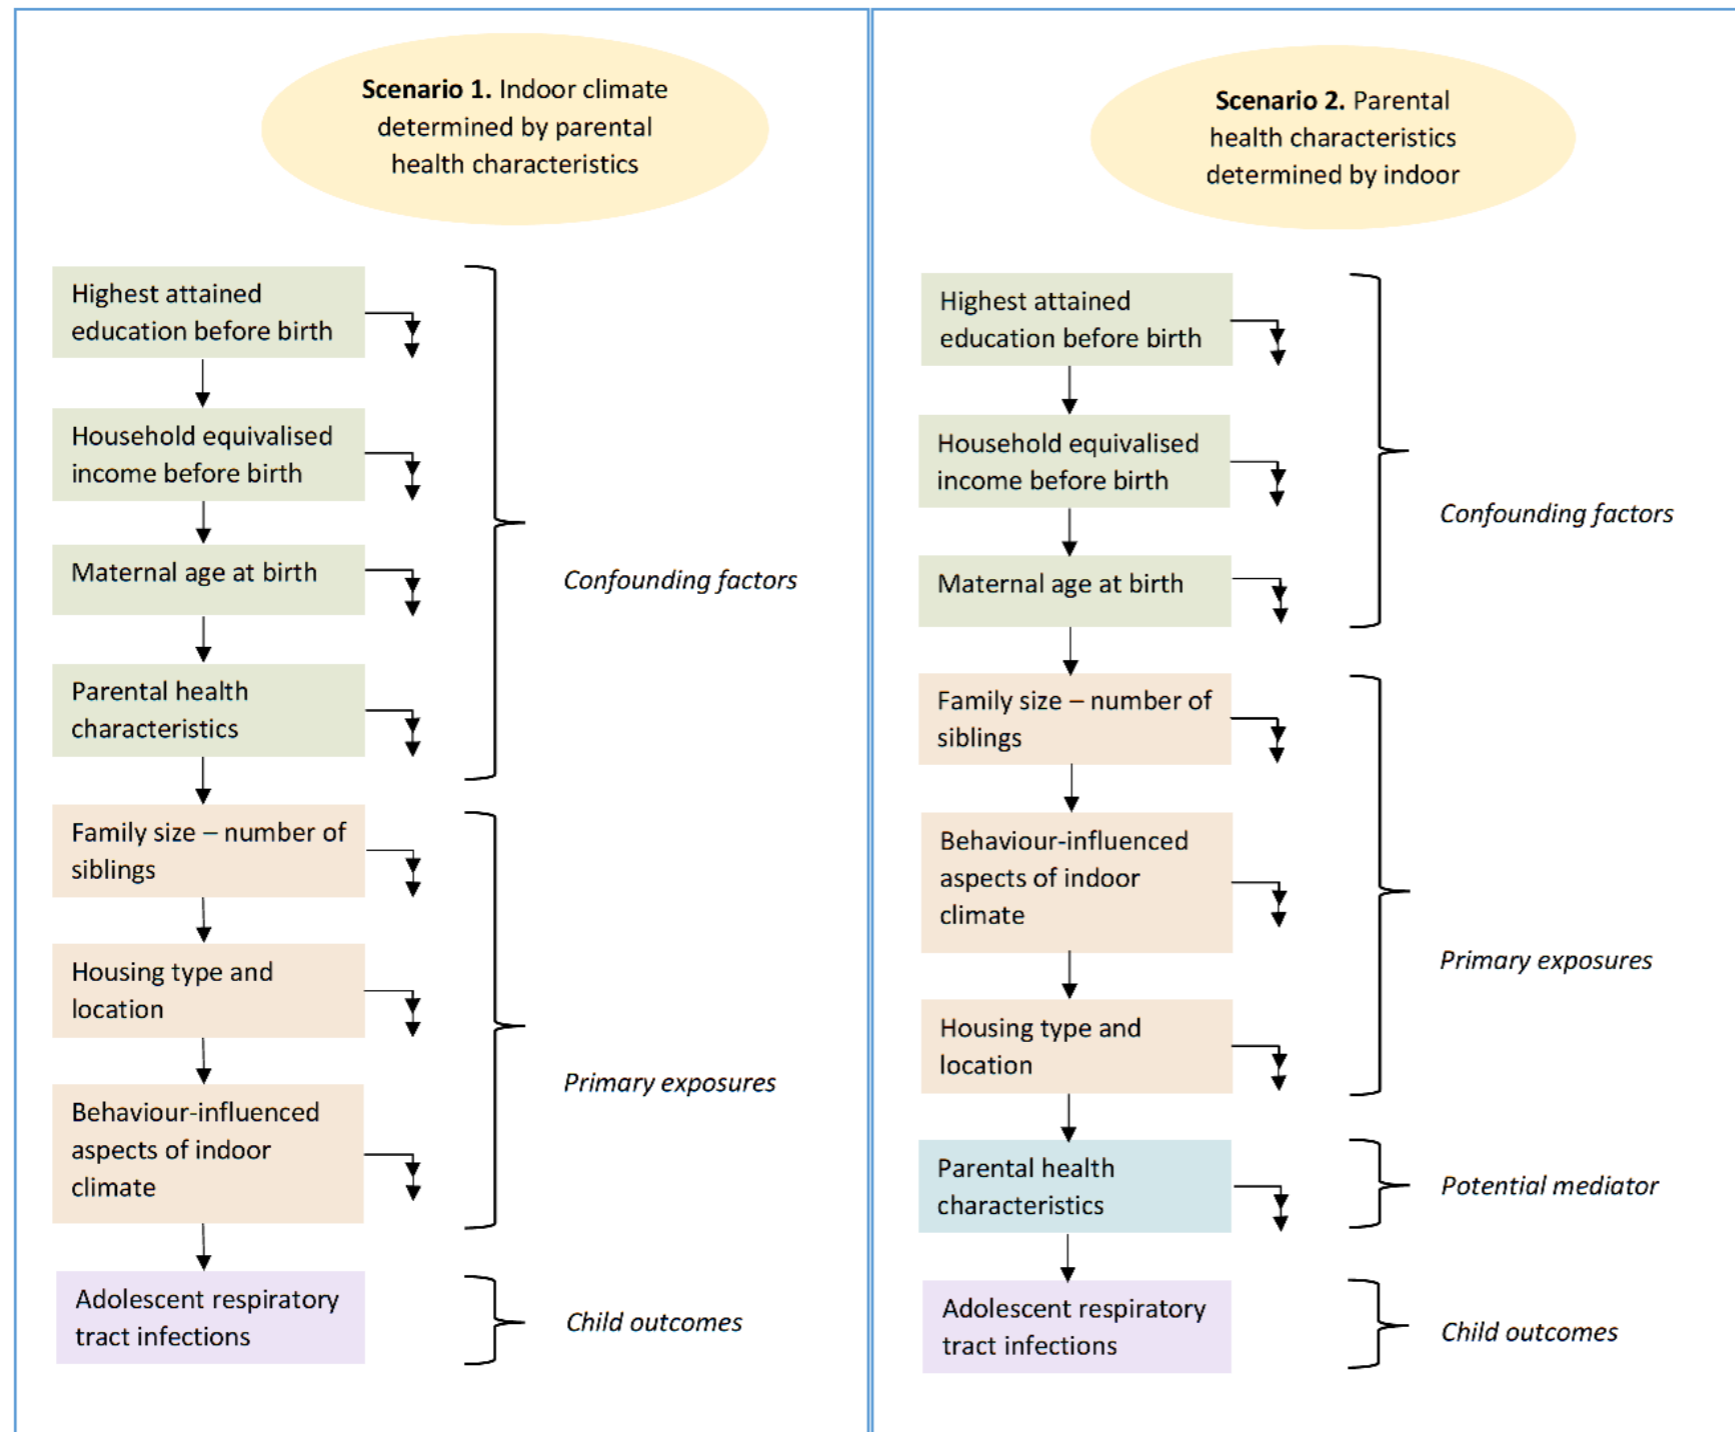

eFigure 1. Saturated directed acyclic graph

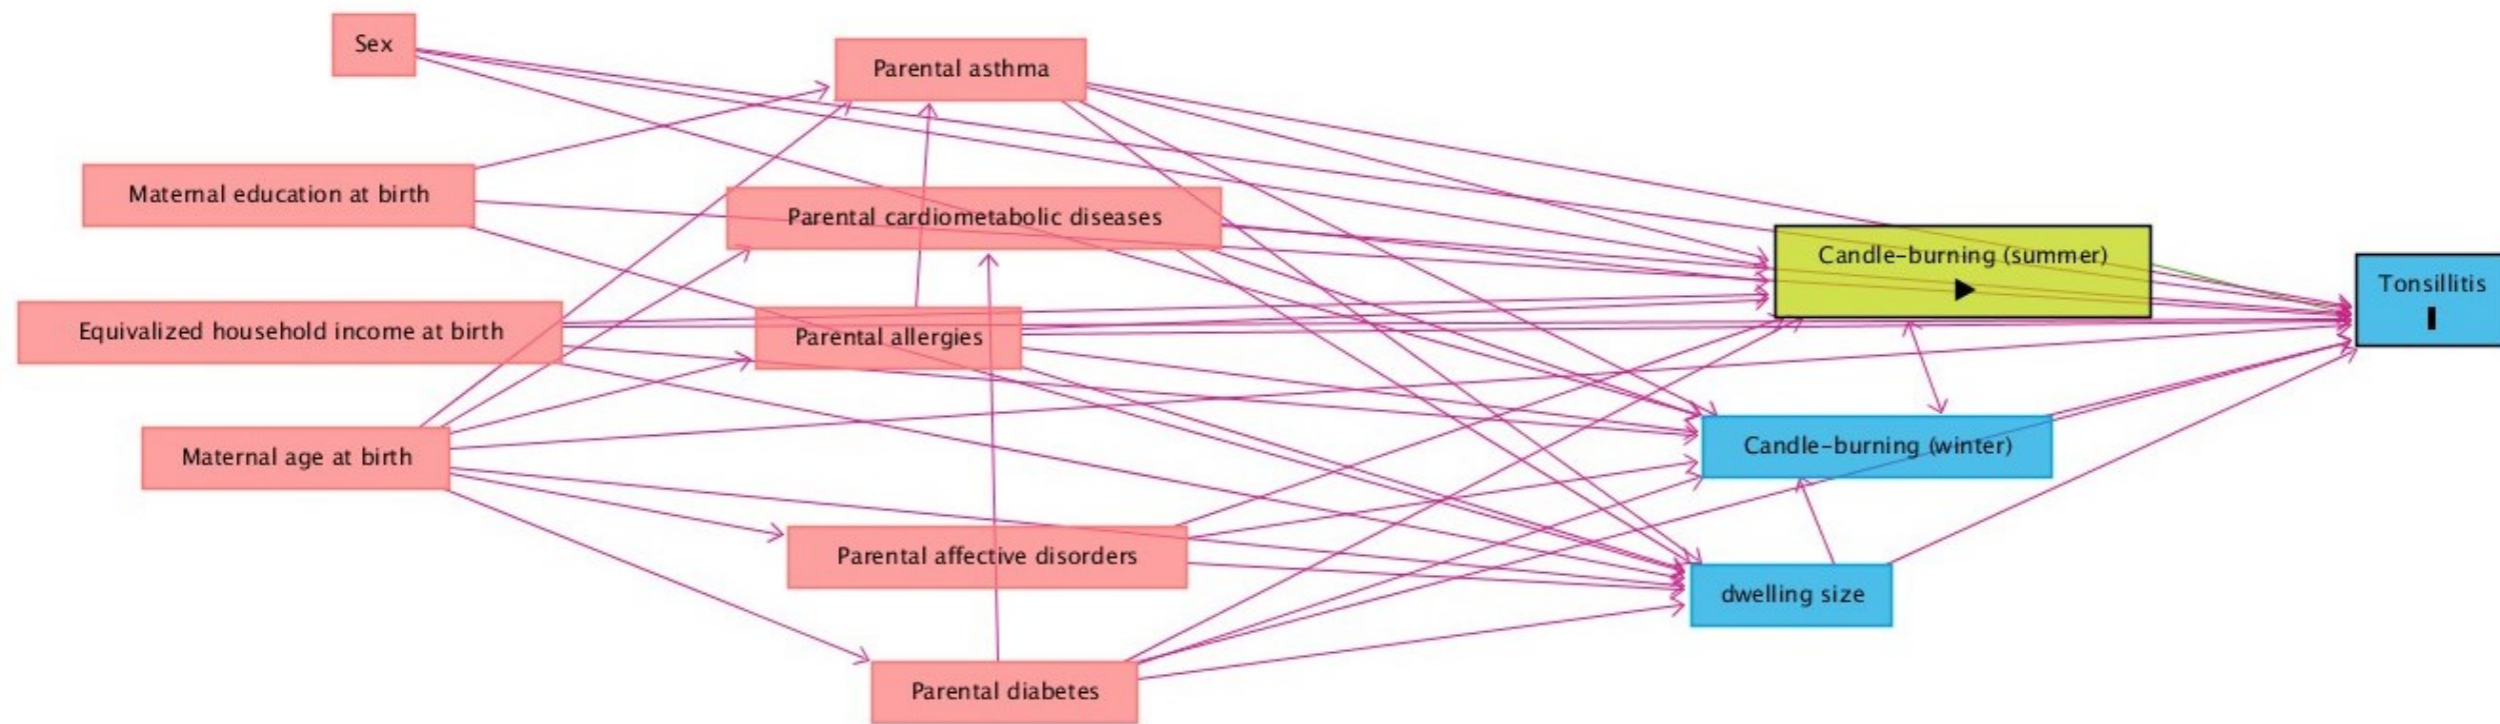

**eFigure 2.** Directed acyclic graph demonstrating model assumptions for analyses of summer candle-burning

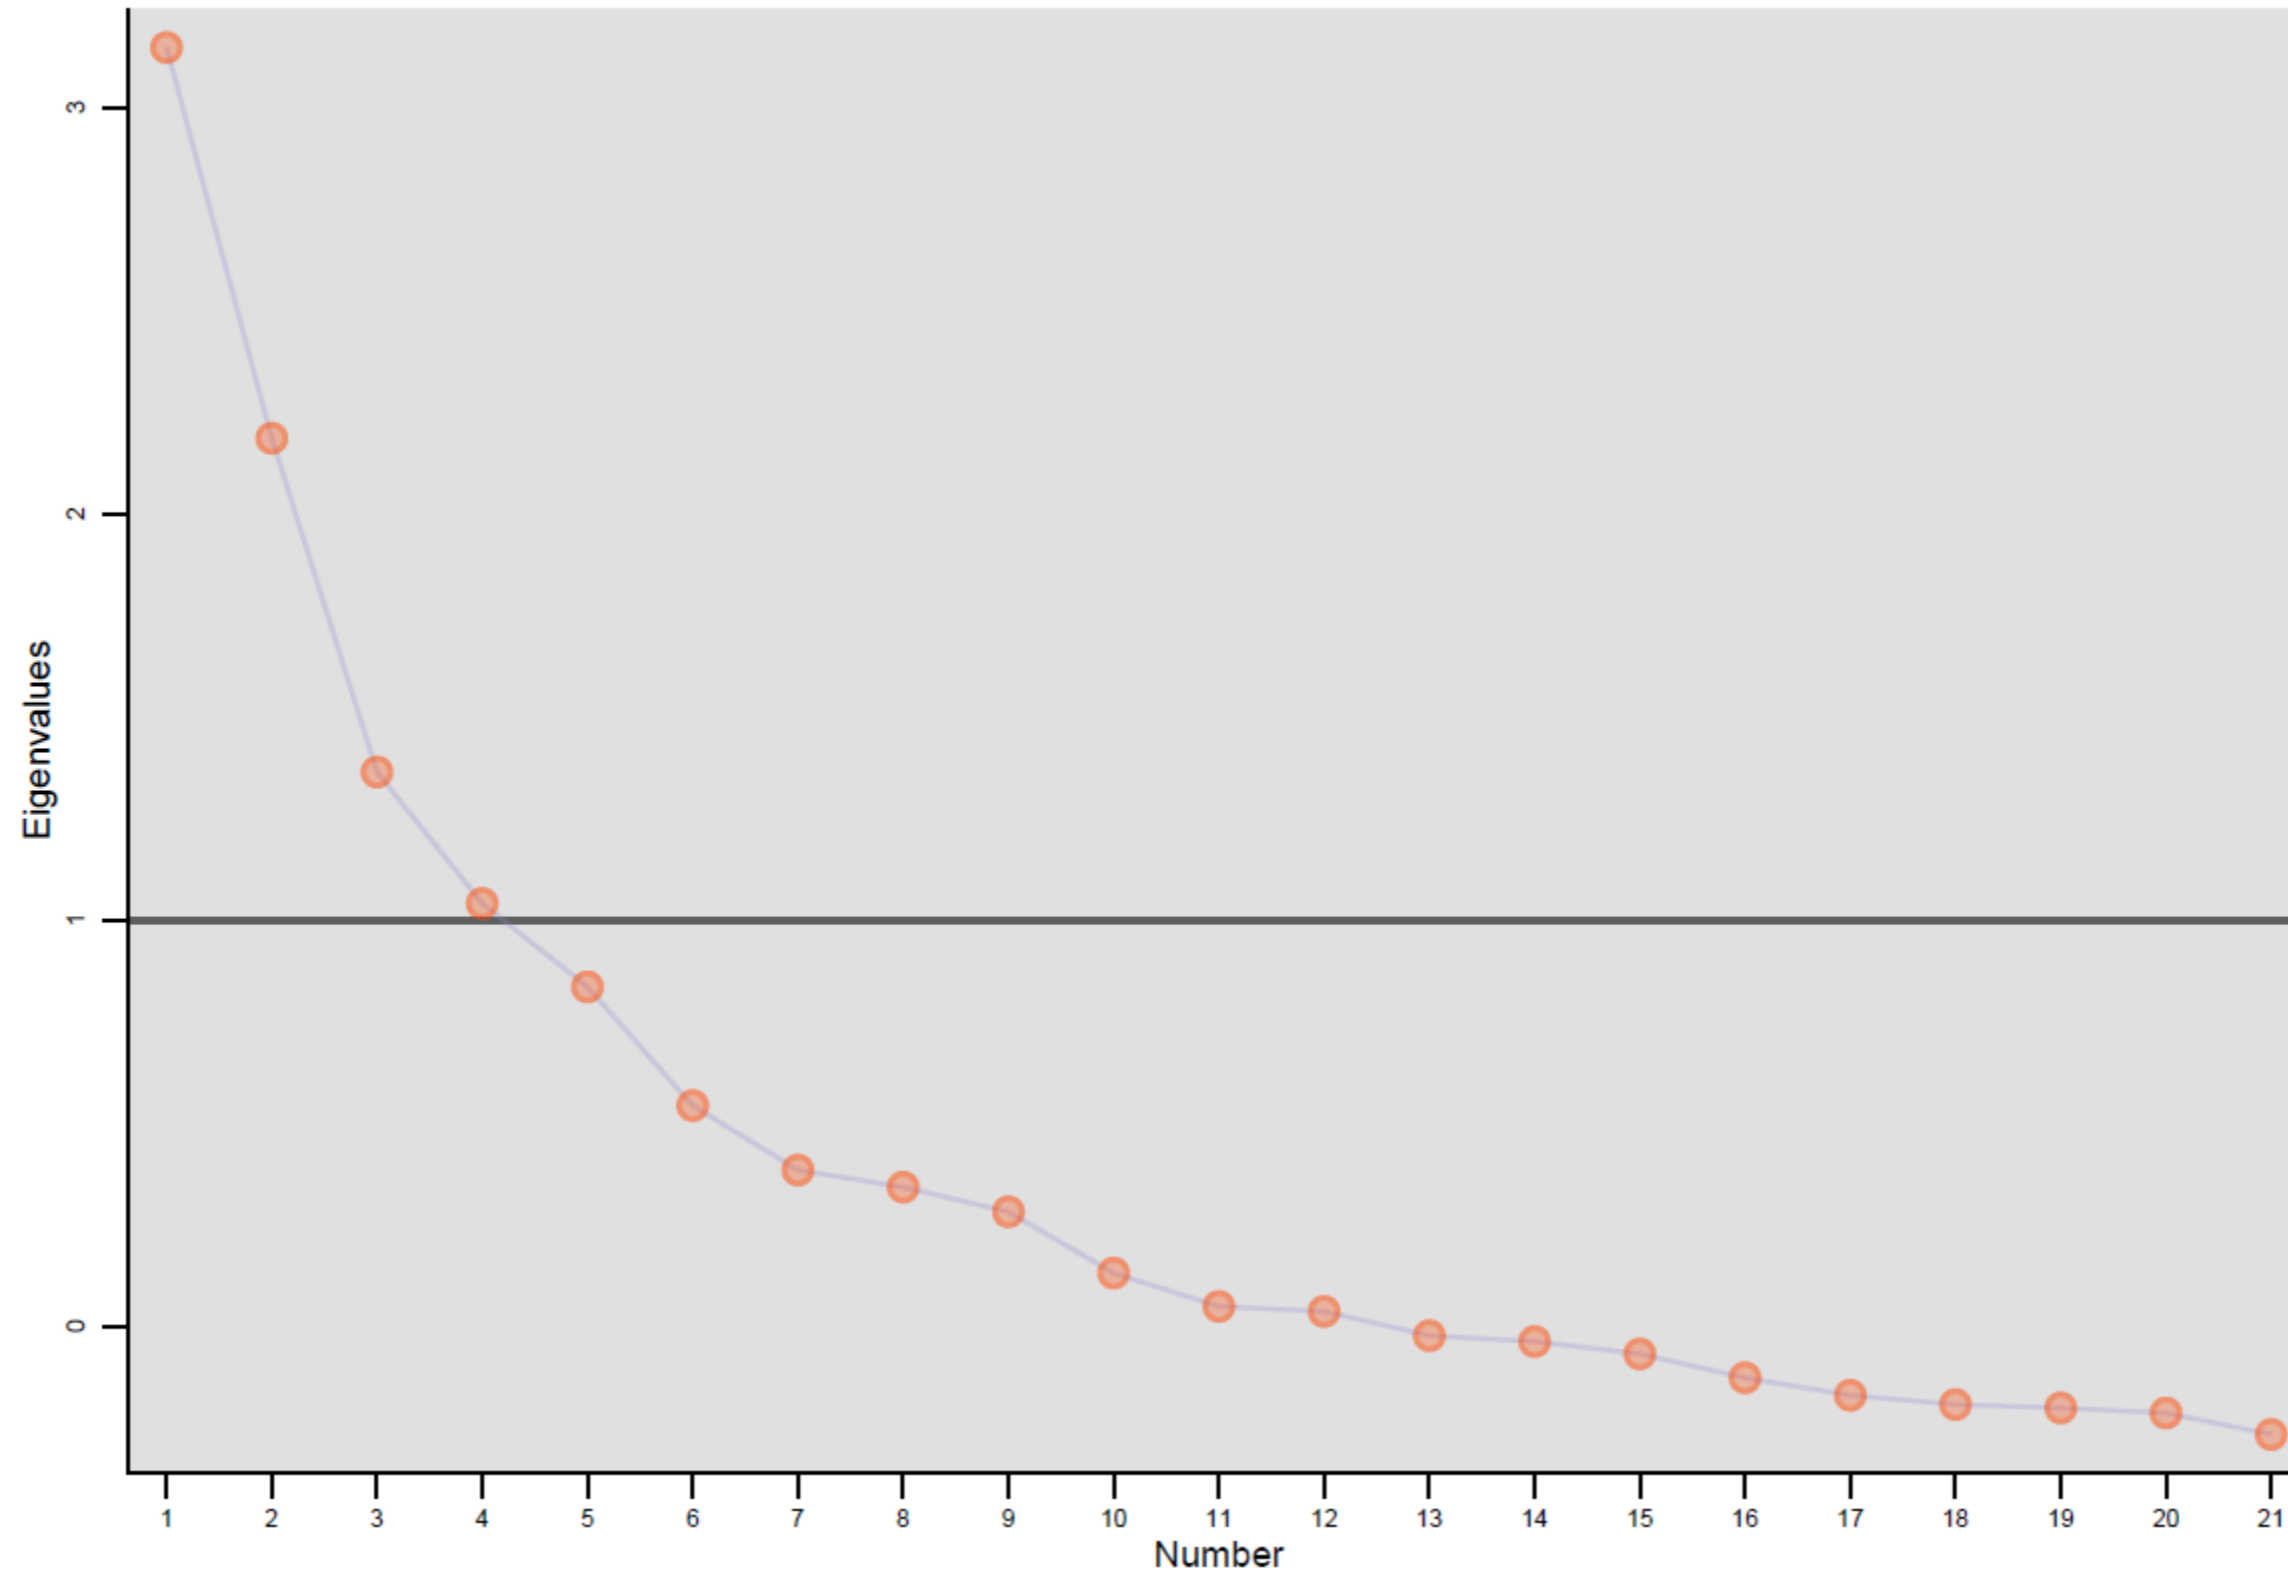

eFigure 3. Scree plot of factor retention

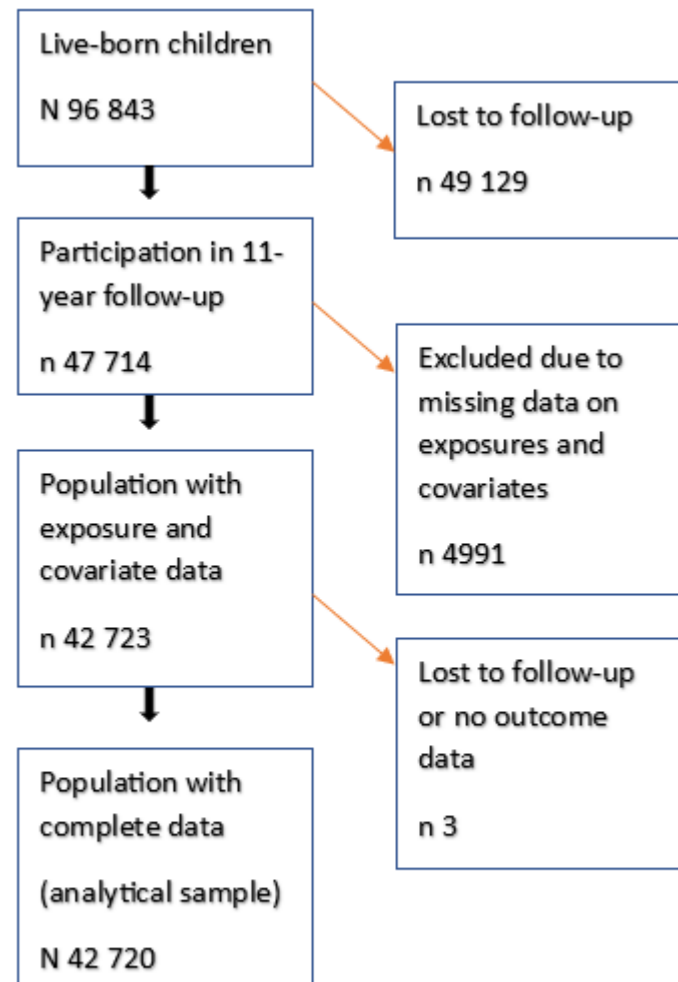

eFigure 4. Flow chart of participation
